# Supplementary material for: Klebsiella oxytoca enterotoxins tilimycin and tilivalline have distinct host DNA-damaging and microtubule-stabilizing activities
Source: PubMed Central journal article supplement — Proc Natl Acad Sci U S A. 2019 Feb 11;116(9):3774–83. doi: 10.1073/pnas.1819154116 (PMC6397511; doi:10.1073/pnas.1819154116), 2019-02-11
Supplement: pnas.1819154116.sapp.pdf [file pnas.1819154116.sapp.pdf]

Supplementary Information for

***Klebsiella oxytoca* enterotoxins tilimycin and tilivalline have distinct host DNA damaging and microtubule stabilizing activities**

Katrin Unterhauser<sup>1</sup>, Lisa Pörtl<sup>1‡</sup>, Georg Schneditz<sup>1‡</sup>, Sabine Kienesberger<sup>1</sup>, Ronald A. Glabonjat<sup>2</sup>, Maksym Kitsera<sup>1</sup>, Jakob Pletz<sup>2,3</sup>, Fernando Josa-Prado<sup>4</sup>, Elisabeth Dornisch<sup>1</sup>, Christian Lembacher-Fadum<sup>3</sup>, Sandro Roier<sup>1</sup>, Gregor Gorkiewicz<sup>5,6</sup>, Daniel Lucena<sup>4</sup>, Isabel Barasoain<sup>4</sup>, Wolfgang Kroutil<sup>2</sup>, Marc Wiedner<sup>7</sup>, Joanna I. Loizou<sup>7</sup>, Rolf Breinbauer<sup>3,5</sup>, José Fernando Díaz<sup>4</sup>, Stefan Schild<sup>1,5</sup>, Christoph Högenauer<sup>5,8</sup> and Ellen L. Zechner<sup>1,5\*</sup>

Ellen L. Zechner

Email: [ellen.zechner@uni-graz.at](mailto:ellen.zechner@uni-graz.at)

**This PDF file includes:**

Figures S1 to S5

Tables S1 to S3

**Table S1.** Detection of TM and TV in human colonic fluid and stool samples

| patient | diagnosis | <i>K. oxytoca</i> | cytotoxicity <sup>a</sup> | <i>npsA/B</i> <sup>b</sup> | sample                       | TM | TV |
|---------|-----------|-------------------|---------------------------|----------------------------|------------------------------|----|----|
| A       | AAHC      | +                 | +                         | +                          | colonic fluid <sup>c</sup>   | +  | +  |
|         |           |                   |                           |                            | stool acute                  | +  | +  |
|         |           |                   |                           |                            | stool day 3 <sup>d</sup>     | ~  | +  |
|         |           |                   |                           |                            | stool day 5 <sup>d</sup>     | -  | -  |
| B       | AAHC      | +                 | +                         | +                          | colonic fluid <sup>c,e</sup> | -  | -  |
|         |           |                   |                           |                            | stool acute                  | +  | +  |
|         |           |                   |                           |                            | stool day 25 <sup>d</sup>    | -  | +  |
| C       | AAHC      | +                 | +                         | +                          | colonic fluid <sup>c</sup>   | +  | +  |
|         |           |                   |                           |                            | stool day 41 <sup>d</sup>    | -  | -  |

<sup>a</sup> Determined with MTT-assay;<sup>b</sup> Gene presence verified with PCR;<sup>c</sup> Obtained by colonoscopy at diagnosis;<sup>d</sup> Follow up stool samples taken after diagnosis;<sup>e</sup> Patient received colonic lavage prior to endoscopy;+/- Above/below limit of detection TM <0.5 nmol g<sup>-1</sup>, TV <0.5 pmol g<sup>-1</sup>;

~ Traces of TM were detectable;

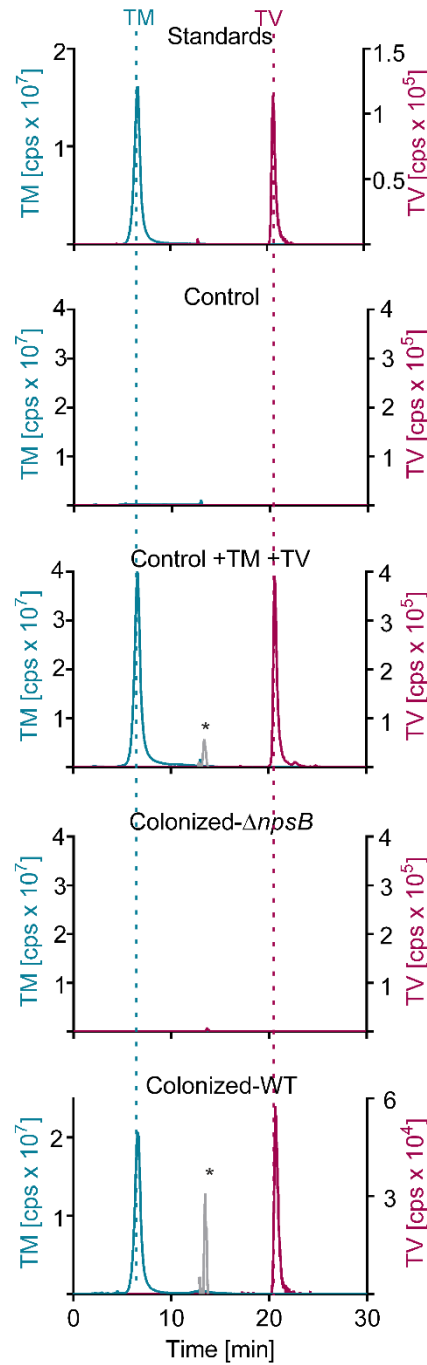

**Fig. S1.** TM and TV are present in feces of mice during colitis. HPLC-ESMS chromatograms detect TM ( $m/z$  235.1004  $\pm$  1 ppm) and TV ( $m/z$  334.1477  $\pm$  1 ppm) in feces of mice colonized with *K. oxytoca*, but not in medication control animals and mice colonized with the toxin negative  $\Delta npsB$ -mutant. 10  $\mu$ M TM and 10 nM TV in *n*-butanol were used as standards. (\*) Peaks at retention time 13 min ( $m/z$  334.1477,  $\pm$  1 ppm) are interferences caused by sample matrix and the applied gradient.

**Table S2.** Sensitivity of tumor cell lines and non-transformed cells to enterotoxins

| Cell line | Tissue   | Tilimycin [ $\mu$ M]                   | Tilivalline [ $\mu$ M]                 |
|-----------|----------|----------------------------------------|----------------------------------------|
|           |          | IC <sub>50</sub> <sup>a</sup> $\pm$ SD | IC <sub>50</sub> <sup>a</sup> $\pm$ SD |
| HeLa      | Cervix   | 3.21 $\pm$ 0.04                        | 6.57 $\pm$ 0.88                        |
| HT-29     | Colon    | 1.67 $\pm$ 0.03                        | 3.44 $\pm$ 0.79                        |
| SW48      | Colon    | 1.42 $\pm$ 0.12                        | 3.70 $\pm$ 0.32                        |
| T84       | Colon    | 1.46 $\pm$ 0.15                        | 21.65 $\pm$ 1.44                       |
| A549      | Lung     | 1.88 $\pm$ 0.38                        | 7.59 $\pm$ 0.88                        |
| 1A9       | Ovary    | 1.74 $\pm$ 0.07                        | 3.63 $\pm$ 0.20                        |
| LNCaP     | Prostate | 0.85 $\pm$ 0.21                        | 32.81 $\pm$ 0.98                       |
| MCF7      | Breast   | 0.80 $\pm$ 0.06                        | 50.25 $\pm$ 14.59                      |
| HUVEC     | Vein     | 1.17 $\pm$ 0.16                        | 7.21 $\pm$ 1.11                        |
| Hap1      | Leukemia | 1.34 $\pm$ 0.13                        | 4.60 $\pm$ 1.45                        |

<sup>a</sup>50% inhibitory concentration; Values are means  $\pm$  SD (n=4)  
normalized to *n*-butanol and DMSO solvents.

**Table S3.** Bacterial susceptibility to TM and TV

| Strain                           | Gram | Inhibition Zone [mm] <sup>a</sup> |      | Phylum         |
|----------------------------------|------|-----------------------------------|------|----------------|
|                                  |      | TM                                | TV   |                |
| <i>Bifidobacterium longum</i>    | -    | 18 ± 2                            | 0    | Actinobacteria |
| <i>Bifidobacterium bifidum</i>   | +    | 18 ± 3                            | 0    | Actinobacteria |
| <i>Bacteroides fragilis</i>      | -    | 24 ± 3                            | 0    | Bacteroidetes  |
| <i>Pediococcus acidilactici</i>  | -    | 12 ± 1                            | 0    | Firmicutes     |
| <i>Cutibacterium acnes</i>       | -    | 12 ± 2                            | 0    | Firmicutes     |
| <i>Lactobacillus acidophilus</i> | +    | 24 ± 4                            | 0    | Firmicutes     |
| <i>Fusobacterium nucleatum</i>   | -    | 27 ± 1                            | 0    | Fusobacteriia  |
| <i>Proteus mirabilis</i>         | -    | 15 ± 1                            | 0    | Proteobacteria |
| <i>Yersinia enterocolitica</i>   | -    | 17 ± 2                            | 0    | Proteobacteria |
| <i>Enterobacter cloacae</i>      | -    | 0                                 | 0    | Firmicutes     |
| <i>Staphylococcus aureus</i>     | +    | 0                                 | 0    | Firmicutes     |
| <i>Enterococcus faecalis</i>     | +    | 0                                 | 0    | Firmicutes     |
| <i>Ruminococcus gnavus</i>       | +    | 0                                 | 0    | Firmicutes     |
| <i>Klebsiella oxytoca</i> (PAI+) | -    | 0                                 | 0    | Proteobacteria |
| <i>Klebsiella oxytoca</i> (PAI-) | -    | 0                                 | 0    | Proteobacteria |
| <i>Klebsiella pneumoniae</i>     | -    | 0                                 | 0    | Proteobacteria |
| <i>Proteus vulgaris</i>          | -    | 0                                 | n.d. | Proteobacteria |
| <i>Bacillus cereus</i>           | +    | 0                                 | n.d. | Firmicutes     |
| <i>Clostridium difficile</i>     | +    | 0                                 | n.d. | Firmicutes     |
| <i>Bacillus subtilis</i>         | -    | 0                                 | n.d. | Firmicutes     |
| <i>Escherichia coli</i>          | -    | 0                                 | n.d. | Proteobacteria |
| <i>Campylobacter jejuni</i>      | -    | 0                                 | n.d. | Proteobacteria |
| <i>Candida albicans</i>          |      | 0                                 | n.d. | Ascomycota     |

<sup>a</sup>Means ±SD are shown (values in upper box TM n=3,TV n=2; lower box n=1);  
n.d. not determined;

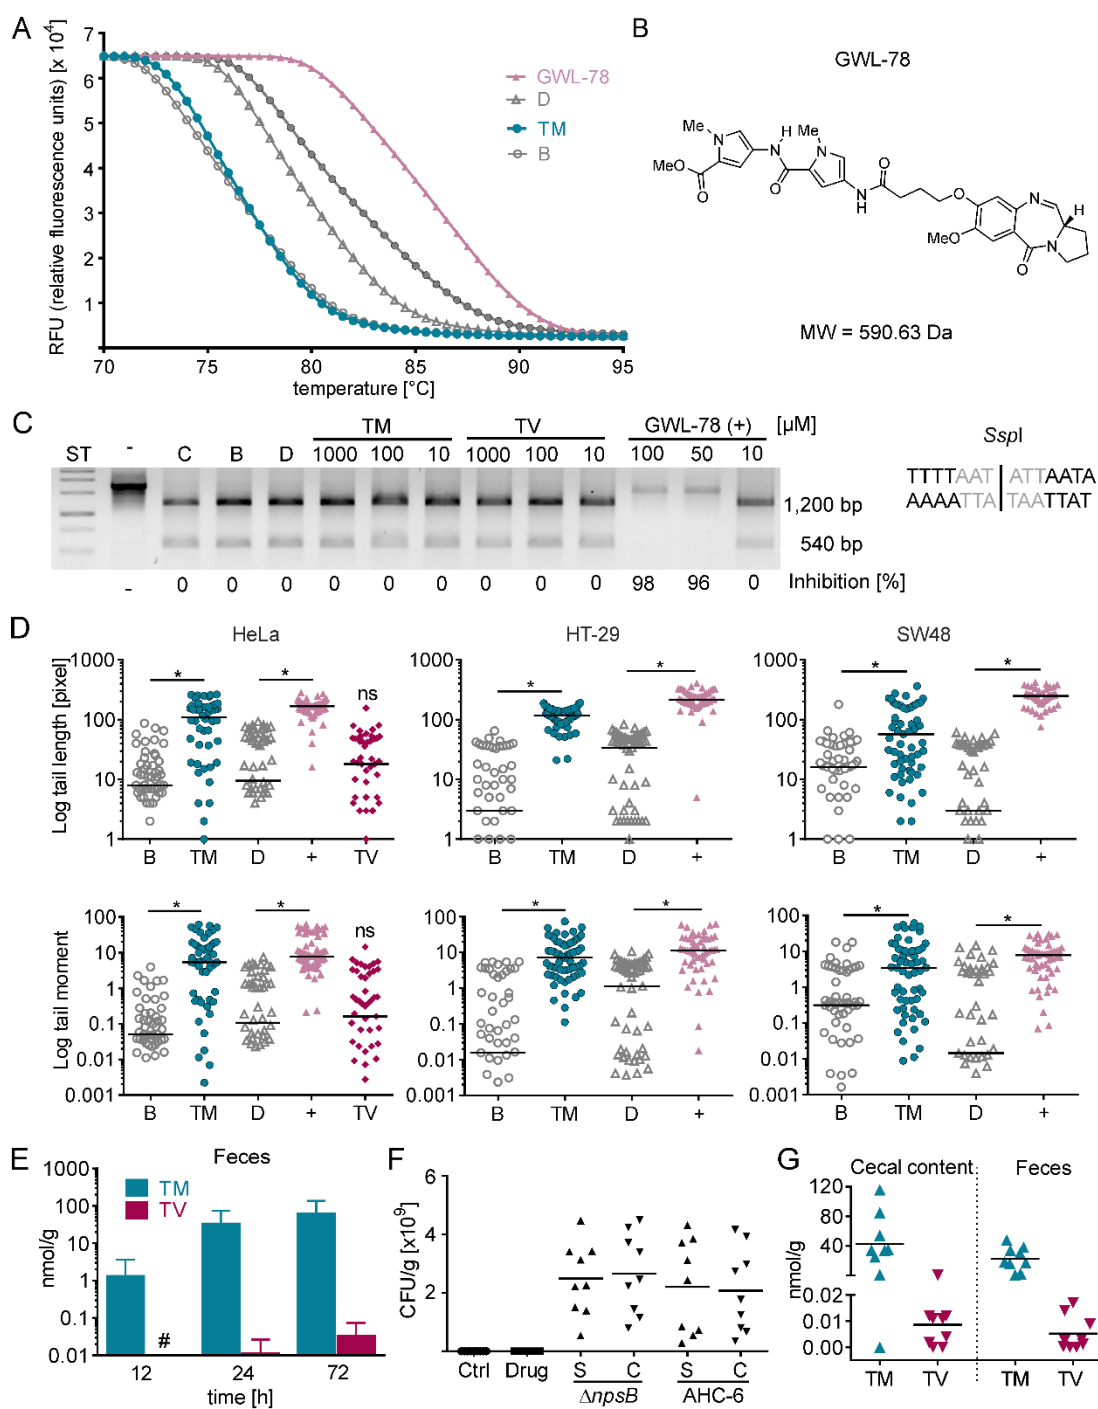

**Fig. S2.** TM interacts with duplex DNA in vitro and induces cellular DNA damage. (A) TM, positive control GWL-78 or solvents DMSO (D) or *n*-butanol (B) were reacted with DNA containing a consensus PBD-binding site (1:1 molar ratio) then denatured thermally. Melting curves show one representative experiment. (B) Structure and molecular weight of

control GWL-78. (C) DNA substrate carrying an *SspI* site (right) was incubated without (C) or with solvents *n*-butanol (B), DMSO (D), different concentrations of enterotoxins, or positive control GWL-78 (+). Inhibition of endonuclease activity was visualized by agarose gel electrophoresis of treated DNA compared to solvent and uncut control (-). (D) Tail length and tail moment for COMET of HeLa treated 4 h with 10  $\mu$ M TM, 10  $\mu$ M GWL-78 (+), 20  $\mu$ M TV, or solvents (B, D). HT-29 and SW48 cells were treated with 1 mM TM or controls. Medians of  $n \geq 50$  cells per treatment are shown. Kruskal-Wallis test followed by Dunn's multiple comparison ( $*P \leq 0.05$ ). (E) TM and TV detected in feces ( $n \geq 3$ ) of *K. oxytoca* colonized mice (# = below limit of detection). (F) *K. oxytoca* cfu  $g^{-1}$  in cecal content of mice from drug, infection groups *K. oxytoca* AHC-6 and  $\Delta npsB$  (each  $n=9$ ) determined with indicated selection-agar as means (S=SCAI-agar, C= CASO-agar). (G) TM and TV concentrations detected in cecal content and feces ( $n=9$ ) of *K. oxytoca* colonized mice (24h). Bars indicate means.

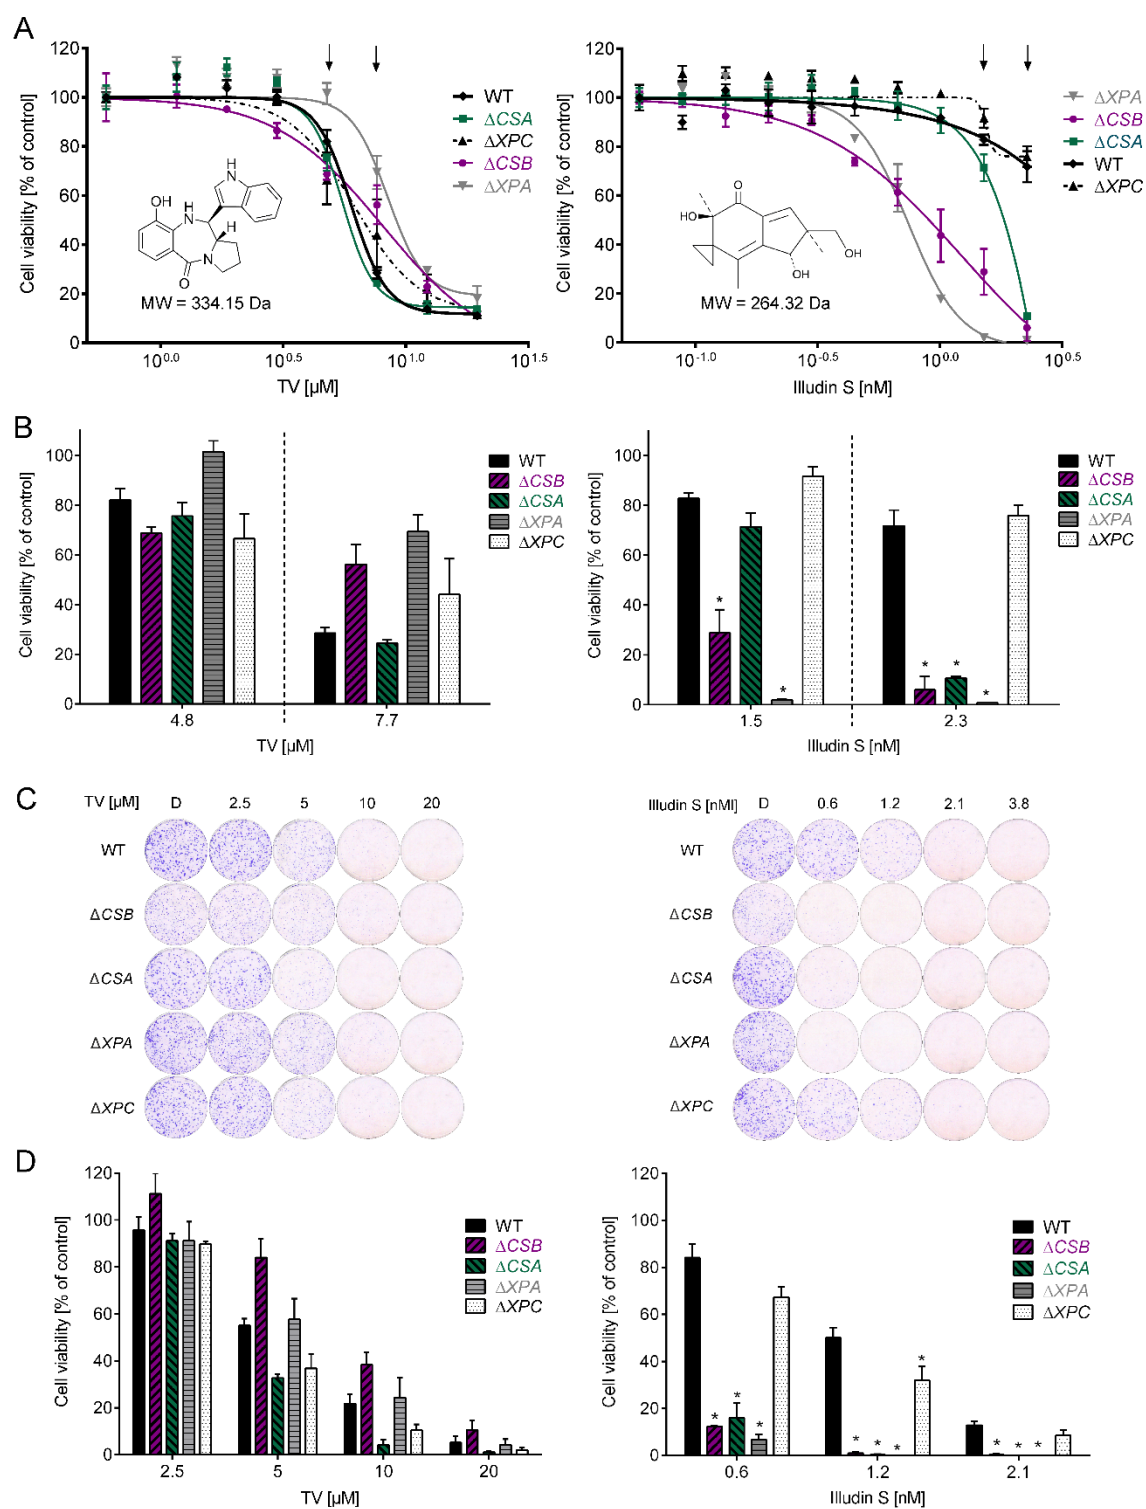

**Fig. S3.** DNA repair-deficient cell lines are hypersensitive to illudin S but not TV. (A) Dose-response survival curves of cells treated with TV (left) and illudin S (right). Values are normalized to solvent controls and represent means  $\pm$  SEM of three technical replicates. Data from one of three biological replicates is shown. (B) Cell viability shown as means  $\pm$

SEM at two assay concentrations for each substance (indicated with arrows in A). (C) Colony formation of cells treated with solvent DMSO (D) or the indicated concentrations of TV and illudin S followed by recovery in drug-free medium. Macroscopic colonies were stained with crystal violet. (D) Values of C normalized to DMSO. Means  $\pm$  SEM are shown (n=3). Significance of results for DNA repair-deficient cell lines compared to WT was calculated using One-Way Anova followed by Sidak's multiple comparison ( $*P \leq 0.05$ ).

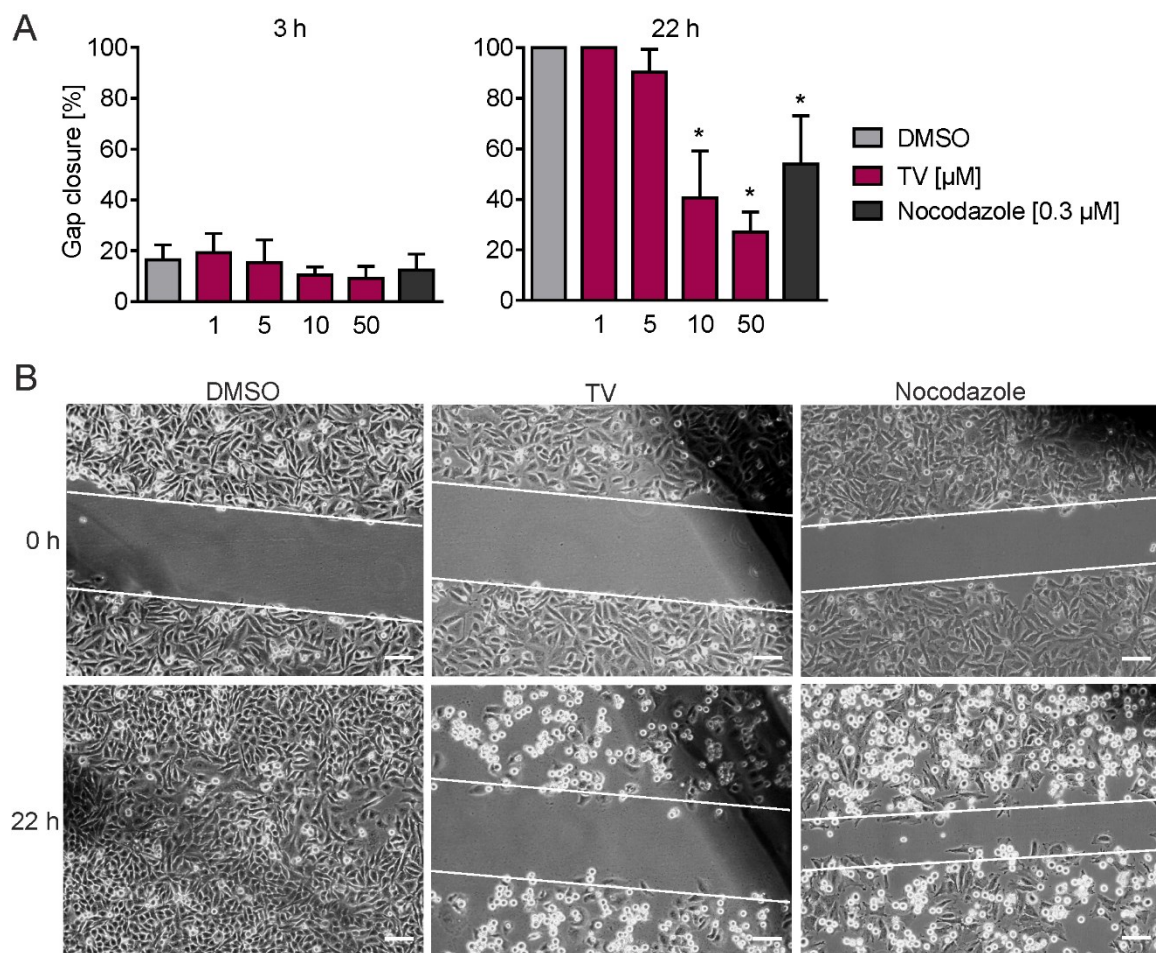

**Fig. S4.** TV inhibits reconstitution of cell monolayer. (A) Percent gap closure of TV- or controls- treated HeLa cell monolayers relative to solvent after 3 and 22 h indicated as means  $\pm$  SD (n=6). One-way ANOVA followed by Sidak's multiple comparison ( $*P \leq 0.05$ ). (B) Inhibition of reconstitution with 50  $\mu$ M TV and 0.3  $\mu$ M nocodazole at 22 h compared to solvent. Scale bars = 100  $\mu$ m.

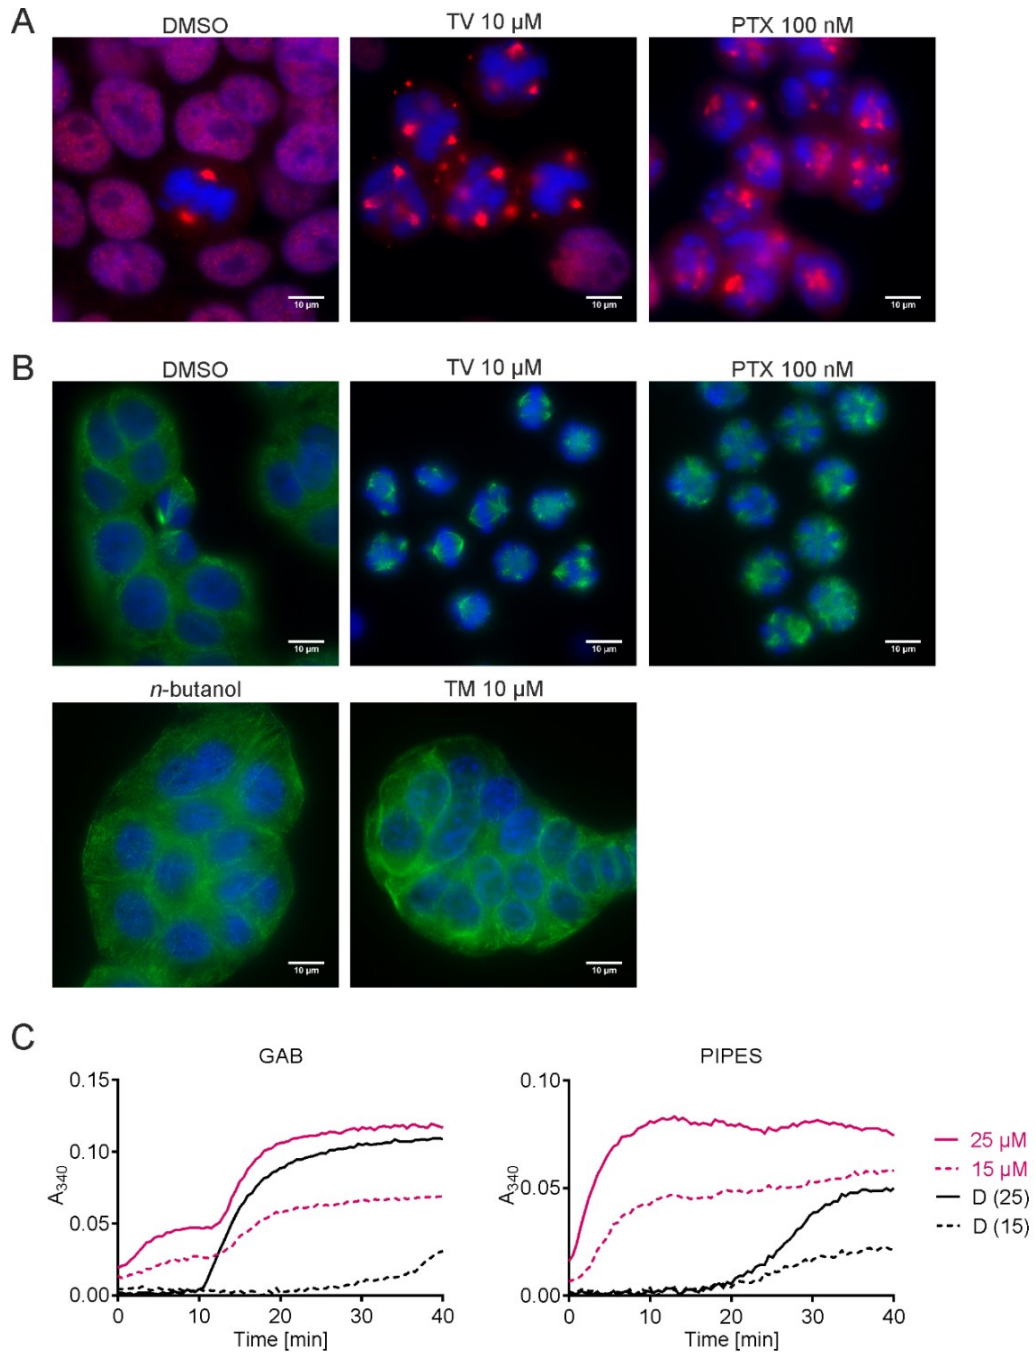

**Fig. S5.** TV induced tubulin phenotype is cell line and buffer independent. (A) Multipolar spindles were detected in HT-29 cells with antibody to nuclear mitotic apparatus protein (NuMA) (channel colour was changed to red). (B)  $\beta$ -tubulin (green) of HT-29 cells treated with DMSO, TV, PTX, *n*-butanol and TM. DNA is stained with DAPI (blue). (C) Polymerization of 15  $\mu$ M and 25  $\mu$ M tubulin in GAB or PIPES buffer in the presence of 100  $\mu$ M TV (pink) or DMSO (D, black).
